# Supplementary material for: Size of silk fibroin β-sheet domains affected by Ca2+
Source: Royal Society of Chemistry journal article supplement (doi:10.1039/c6tb01101b), 2016-01-01
Supplement: c6tb01101b1.pdf [file c6tb01101b1.pdf]

## Supporting Information

### Size of silk fibroin $\beta$ -sheet domains affected by $\text{Ca}^{2+}$

N. Drnovšek<sup>a</sup>, R. Kocen<sup>a</sup>, A. Gantar<sup>a</sup>, M. Drobnič-Košorok<sup>b</sup>, A. Leonardi<sup>c</sup>, I. Križaj<sup>c,d</sup>, A. Rečnik<sup>a</sup>, Saša Novak<sup>a,c</sup>

<sup>a</sup> Department for Nanostructured Materials, Jožef Stefan Institute, Ljubljana, Slovenia

<sup>b</sup> Institute of Physiology, Pharmacology and Toxicology, Veterinary Faculty, University of Ljubljana, Ljubljana, Slovenia

<sup>c</sup> Department of Molecular and Biomedical Sciences, Jožef Stefan Institute, Ljubljana, Slovenia

<sup>d</sup> Faculty of Chemistry and Chemical Technology, University of Ljubljana, Ljubljana, Slovenia

<sup>e</sup> Jožef Stefan International Postgraduate School, Ljubljana, Slovenia

**Table S1:** Mass spectrometric analysis of sericin in the silk fibroin preparation. Silk sericin extract and fibroin preparation in depicted amounts were hydrolysed in solution with trypsin. Peptide mixtures were analysed on ESI ion trap mass spectrometer 1200 series HPLC-Chip-LC/MSD Trap XCT Ultra. Identification of proteins relies on the MS/MS-derived peptide sequences that are listed.

| Sample               | Quantity analysed [µg] | Identified proteins | Swiss-Prot accession number | Mascot protein score    | Peptide sequence        | z         | Calculated peptide mass |   |           |
|----------------------|------------------------|---------------------|-----------------------------|-------------------------|-------------------------|-----------|-------------------------|---|-----------|
| silk sericin extract | 0.175                  | sericin 1           | SERI1_BOMMO                 | 135                     | ASSTIYADKDQIR           | 2         | 1467.7445               |   |           |
|                      |                        |                     |                             |                         | ASSTIYADKDQIR           | 3         | 1467.7445               |   |           |
|                      |                        |                     |                             |                         | YTSGPEGVSYSGR           | 3         | 1359.6181               |   |           |
|                      |                        | fibroin light chain | FIBL_BOMMO                  | 110                     | SIAILNVQEILK            | 2         | 1340.8155               |   |           |
|                      |                        |                     |                             |                         | YIAQAASQVHV             | 2         | 1186.6220               |   |           |
|                      |                        |                     |                             |                         | ASSTIYADKDQIR           | 2         | 1467.7445               |   |           |
|                      | 0.35                   | sericin 1           | SERI1_BOMMO                 | 239                     | KASSTIYADKDQIR          | 3         | 1595.8394               |   |           |
|                      |                        |                     |                             |                         | SDAASEDGFWWW NR         | 2         | 1813.7570               |   |           |
|                      |                        |                     |                             |                         | YTSGPEGVSYSGR           | 2         | 1359.6181               |   |           |
|                      |                        | fibroin light chain | FIBL_BOMMO                  | 200                     | AWDYVDDTDKSIAIL NVQEILK | 3         | 2549.3143               |   |           |
|                      |                        |                     |                             |                         | SIAILNVQEILK            | 2         | 1340.8155               |   |           |
|                      |                        |                     |                             |                         | YIAQAASQVHV             | 2         | 1186.6220               |   |           |
| fibroin heavy chain  | FIBH_BOMMO             | 52                  | DASGAVIEEQITTK              | 2                       | 1460.7358               |           |                         |   |           |
|                      |                        |                     | 1.75                        | sericin 1               | SERI1_BOMMO             | 194       | NDNVFVYR                | 2 | 1026.5008 |
|                      |                        |                     |                             |                         |                         |           | SDAASEDGFWWW NR         | 2 | 1813.7570 |
| SDAASEDGFWWW NRRK    | 3                      | 2097.9532           |                             |                         |                         |           |                         |   |           |
| fibroin light chain  | FIBL_BOMMO             | 153                 |                             | AWDYVDDTDKSIAIL NVQEILK | 3                       | 2549.3143 |                         |   |           |
|                      |                        |                     |                             | SIAILNVQEILK            | 2                       | 1340.8155 |                         |   |           |
|                      |                        |                     |                             | YIAQAASQVHV             | 2                       | 1186.6220 |                         |   |           |
| fibroin heavy chain  | FIBH_BOMMO             | 72                  | DASGAVIEEQITTK              | 2                       | 1460.7358               |           |                         |   |           |
|                      |                        |                     | silk fibroin                | 35                      | FIBL_BOMMO              | 123       | SIAILNVQEILK            | 2 | 1340.8155 |
|                      |                        |                     |                             |                         |                         |           | YIAQAASQVHV             | 2 | 1186.6220 |
| fibroin heavy chain  | FIBH_BOMMO             | 64                  |                             |                         |                         |           | DASGAVIEEQITTK          | 2 | 1460.7358 |

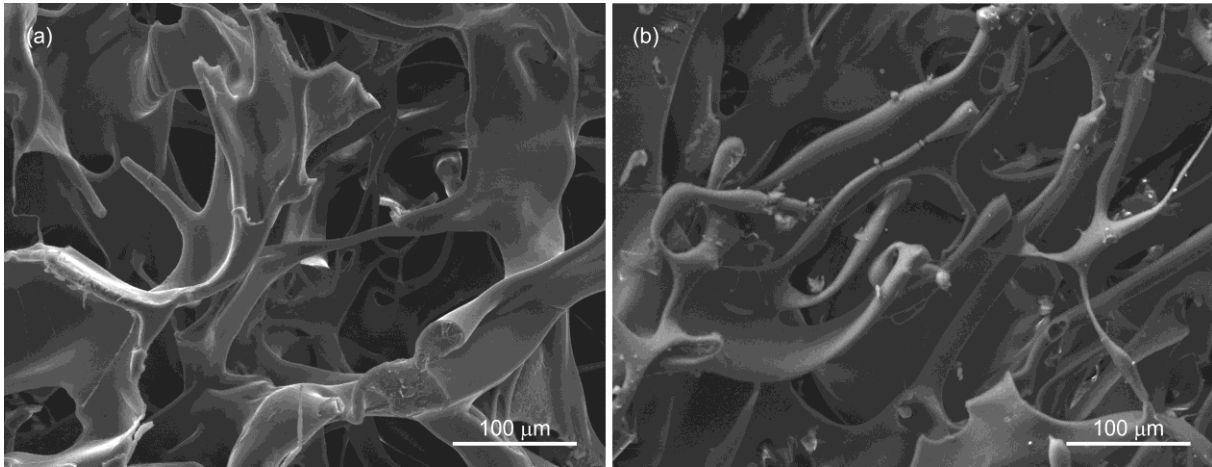

**Fig. S1** Microstructures of dried SF scaffolds with the highest concentration of  $\text{CaCl}_2$ : (a) Ca300 and (b) Ca500. Threads were formed instead of walls resulting in destruction of the scaffolds during ethanol incubation.

**Table S2** The secondary structure peak assignments for amide I band frequencies.

| Wavelength ( $\text{cm}^{-1}$ ) | Type of secondary structure              | Ref.   |
|---------------------------------|------------------------------------------|--------|
| 1715                            | $\beta$ -turns                           | 1      |
| 1697-1703                       | $\beta$ -sheet (weak)                    | 2      |
| 1686-1696                       | $\beta$ -turns and bends                 | 2      |
| 1681-1696                       | $\beta$ -turns and bends                 | 3      |
| 1671-1685                       | $\beta$ -turns and bends                 | 2      |
| 1671-1679                       | $\beta$ -turns and bends                 | 3      |
| 1668-1671                       | $\beta$ -turns and bends                 | 3      |
| 1663-1670                       | $\beta$ -turns and bends                 | 2      |
| 1656-1662                       | $\alpha$ -helices                        | 2      |
| 1655                            | $\alpha$ -helices                        | 4      |
| 1654                            | Random coil                              | 5      |
| 1650                            | Random coil                              | 4      |
| 1647-1655                       | Random coil                              | 2      |
| 1641-1647                       | Random coil                              | 4      |
| 1640-1648                       | Random coil                              | 3      |
| 1638-1646                       | Random coil random coils/extended chains | 2, 6   |
| 1638                            | Random coil                              | 5      |
| 1628-1637                       | $\beta$ -sheets                          | 2-4, 7 |

|           |                                         |      |
|-----------|-----------------------------------------|------|
| 1623      | Antiparallel $\beta$ -sheet             | 2    |
| 1621-1627 | $\beta$ -sheet                          | 2, 3 |
| 1620      | Parallel $\beta$ -sheet                 | 2    |
| 1618      | $\beta$ -sheet                          | 8    |
| 1616-1637 | $\beta$ -sheet                          | 9    |
| 1616-1621 | Aggregate b strand/ $\beta$ -sheet weak | 10   |
| 1605-1615 | (Tyr) side chains aggregated strands    | 10   |

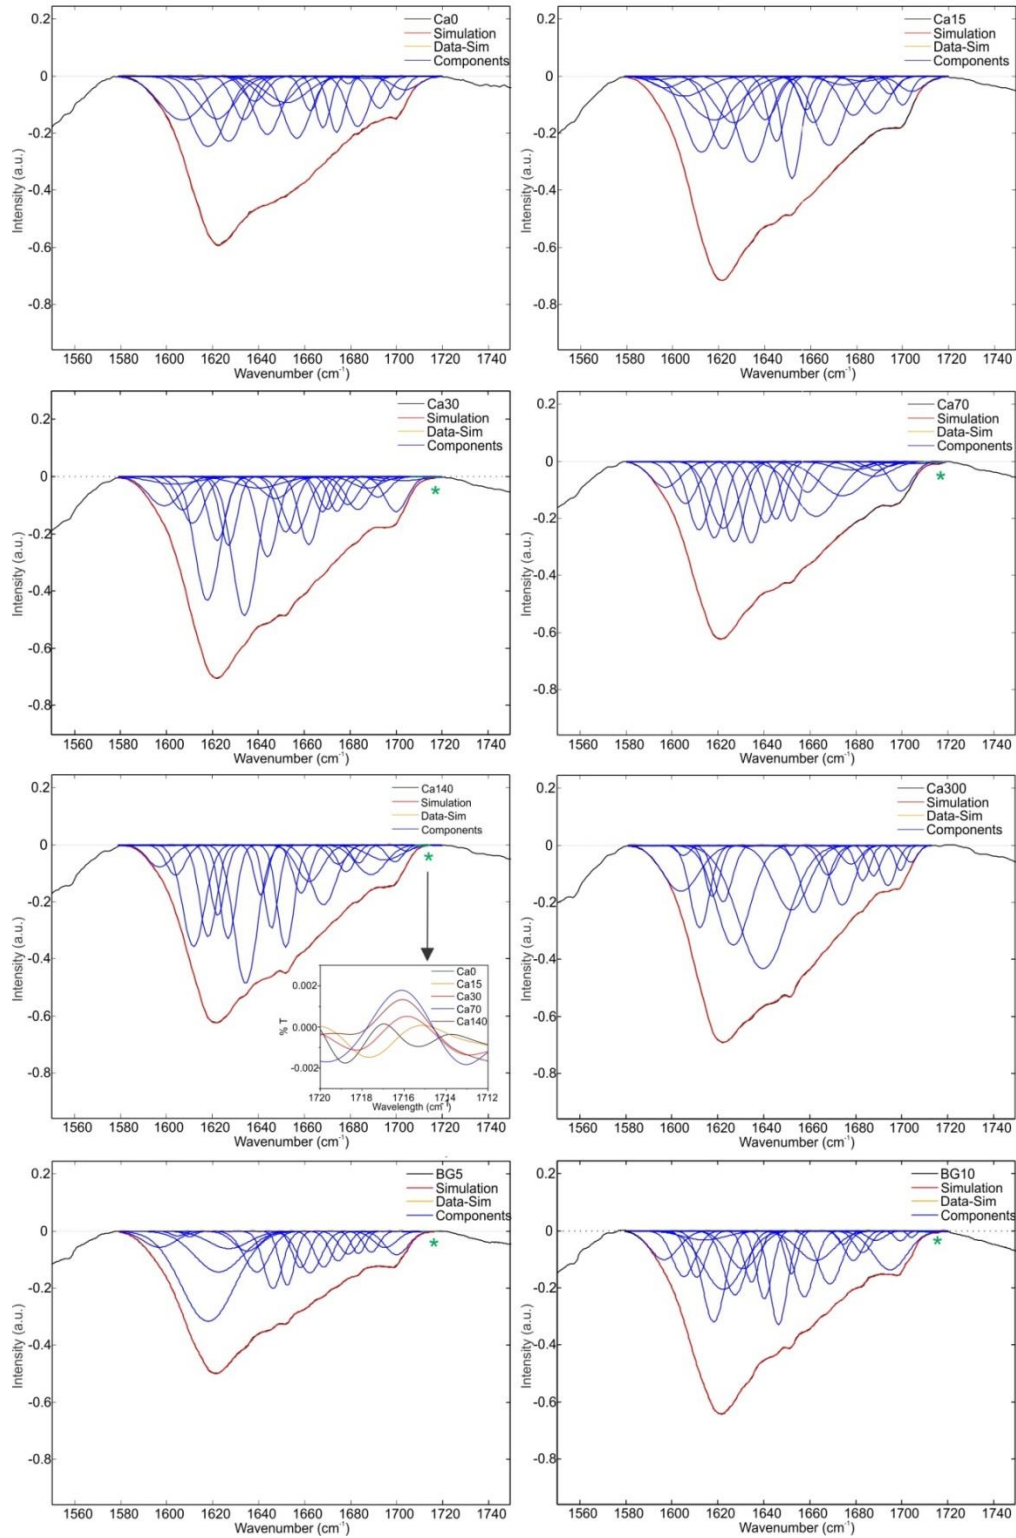

**Fig. S2** Fitted amide I band of fibroin scaffolds: Ca0, Ca15, Ca30, Ca70, Ca140, Ca300, BG5 and BG10. New peak arising at around  $1715\text{ cm}^{-1}$  is marked with green \* and is more clearly presented in the inset in Graph Ca140 that shows second derivative FTIR spectra at wavelengths around  $1715\text{ cm}^{-1}$  where the peak representing  $\beta$ -turns increases with Ca concentration.

## References

1. G. Qin, X. Hu, P. Cebe and D. L. Kaplan, *Nature communications*, 2012, **3**, 1003-1003.
2. X. Hu, D. Kaplan and P. Cebe, *Macromolecules*, 2006, **39**, 6161-6170.
3. D. Wilson, R. Valluzzi and D. Kaplan, *Biophys J*, 2000, **78**, 2690-2701.
4. H. Zhang, L.-l. Li, F.-y. Dai, H.-h. Zhang, B. Ni, W. Zhou, X. Yang and Y.-z. Wu, *Journal of Translational Medicine*, 2012, **10**, 117.
5. P. Taddei and P. Monti, *Biopolymers*, 2005, **78**, 249-258.
6. S. S. Silva, D. Maniglio, A. Motta, J. F. Mano, R. L. Reis and C. Migliaresi, *Macromolecular Bioscience*, 2008, **8**, 766-774.
7. Q. Zhang, Y. H. Zhao, S. Q. Yan, Y. M. Yang, H. J. Zhao, M. Z. Li, S. Z. Lu and D. L. Kaplan, *Acta Biomaterialia*, 2012, **8**, 2628-2638.
8. M. A. Koperska, D. Pawcenis, J. Bagniuk, M. M. Zaitz, M. Missori, T. Łojewski and J. Łojewska, *Polymer Degradation and Stability*, 2014, **105**, 185-196.
9. J. Brown, C.-L. Lu, J. Coburn and D. L. Kaplan, *Acta Biomaterialia*, 2015, **11**, 212-221.
10. X. Chen, Z. Shao, N. S. Marinkovic, L. M. Miller, P. Zhou and M. R. Chance, *Biophysical Chemistry*, 2001, **89**, 25-34.
